# Supplementary material for: Mycolactone A vs. B: Multiscale Simulations Reveal the Roles of Localization and Association in Isomer-Specific Toxicity
Source: MDPI journal article supplement (doi:10.3390/toxins15080486), 2023-08-02
Supplement: s1 [file s1]

# Supplementary Materials: Mycolactone A vs. B: Multiscale Simulations Reveal the Roles of Localization and Association in Isomer-Specific Toxicity

John D. M. Nguyen, Gabriel C. A. da Hora and Jessica M. J. Swanson

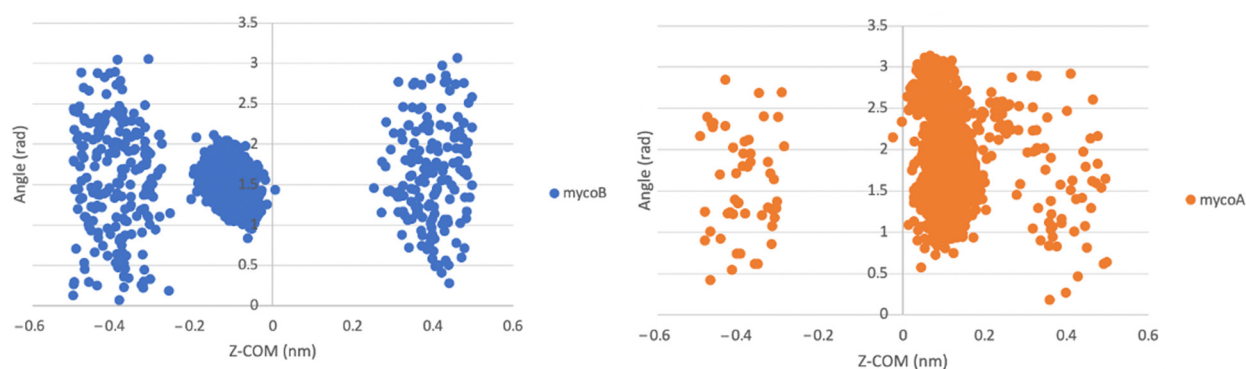

**Figure S1.** Distribution of the two CVs in unbiased simulations of mycolactone A/B with the ER membrane.

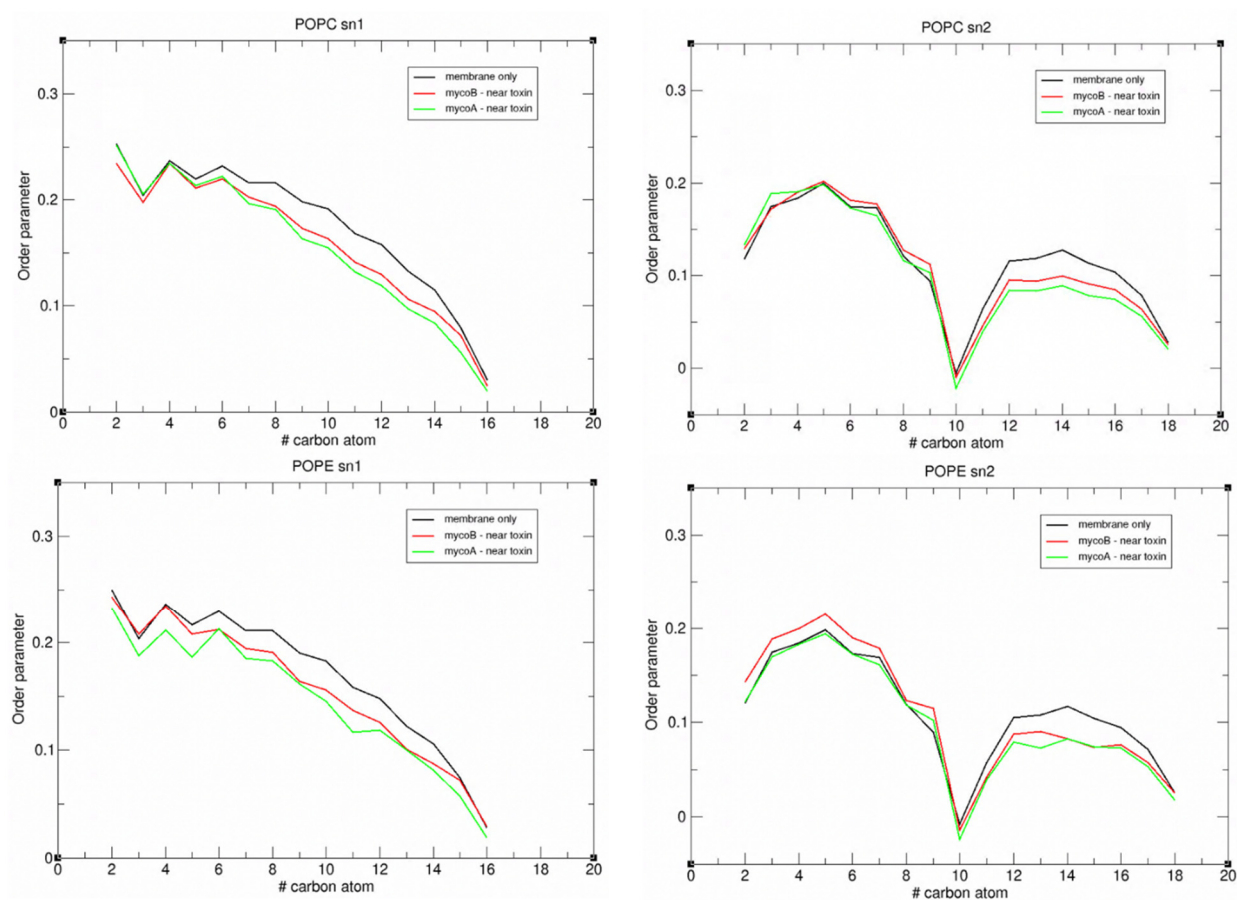

**Figure S2.** Tail order parameters of lipids near mycolactone and lipids of an ER membrane with-out the toxin.

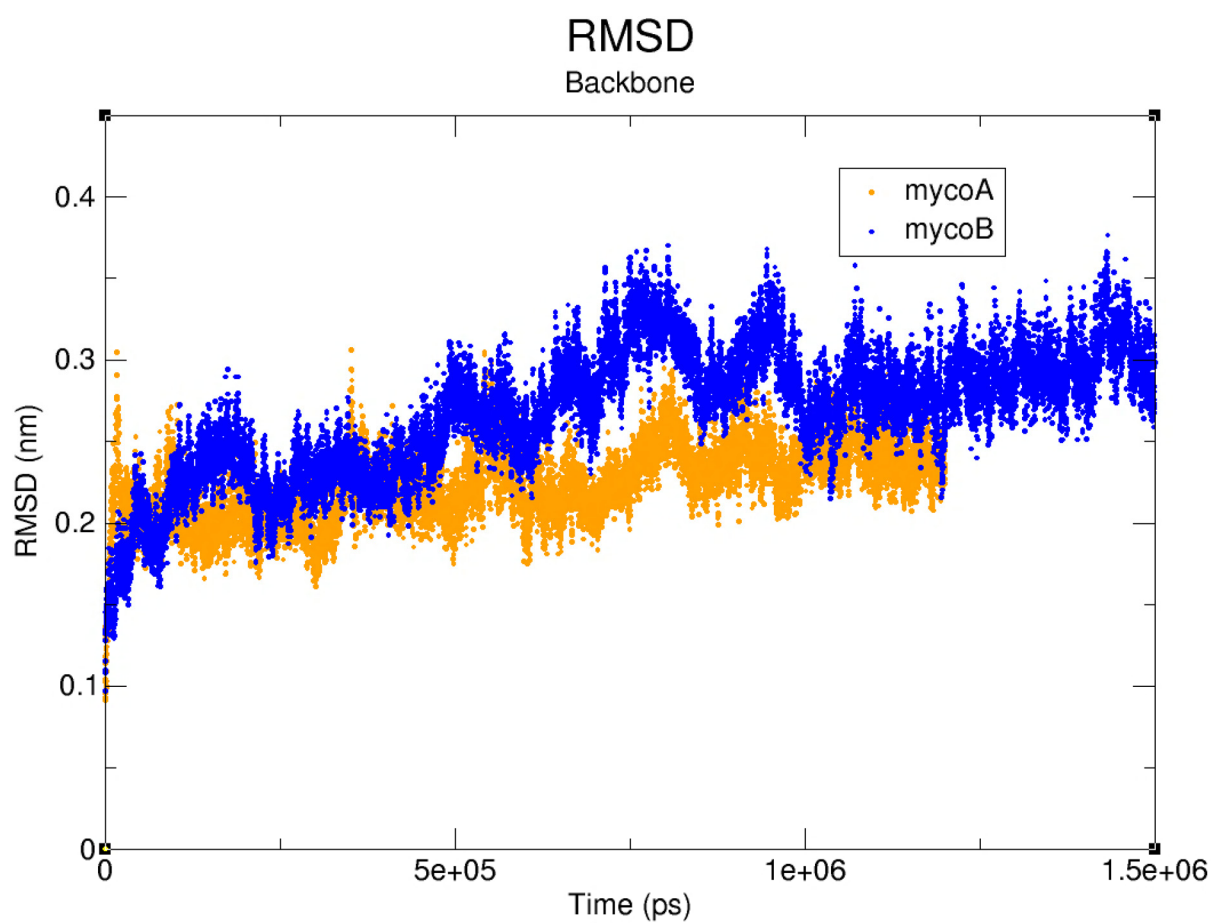

**Figure S3.** Root mean square deviation of mycolactone-Sec61 complexes.
